# Supplementary material
Source: MDPI journal article supplement (https://www.mdpi.com/1999-4907/12/6/710)
Supplement: s1 [file s1]

**Table S1 The GenBank accession numbers of 32 species using in phylogenetic analysis**

| Number | Species                          | Genbank number |
|--------|----------------------------------|----------------|
| 1      | <i>Alpinia katsumadae</i>        | NC_048461      |
| 2      | <i>Alpinia oxyphylla</i>         | KY985237       |
| 3      | <i>Alpinia chinensis</i>         | NC_050165      |
| 4      | <i>Alpinia pumila</i>            | NC_048462      |
| 5      | <i>Amomum krervanh</i>           | NC_036935      |
| 6      | <i>Amomum compactum</i>          | NC_036992      |
| 7      | <i>Wurfbainia longiligularis</i> | MK889505       |
| 8      | <i>Lanxangia tsaoko</i>          | MK926774       |
| 9      | <i>Wurfbainia villosa</i>        | MK262730       |
| 10     | <i>Cautleya gracilis</i>         | NC_046845      |
| 11     | <i>Curcuma longa</i>             | MN711722       |
| 12     | <i>Curcuma sichuanensis</i>      | NC_050035      |
| 13     | <i>Curcuma elata</i>             | NC_050036      |
| 14     | <i>Curcuma yunnanensis</i>       | NC_050037      |
| 15     | <i>Curcuma alismatifolia</i>     | NC_050038      |
| 16     | <i>Curcuma amarissima</i>        | NC_050039      |
| 17     | <i>Curcuma xanthorrhiza</i>      | NC_050040      |
| 18     | <i>Curcuma phaeocaulis</i>       | MK109019       |
| 19     | <i>Curcuma aromatica</i>         | MK621773       |
| 20     | <i>Hedychium coronarium</i>      | NC_045863      |
| 21     | <i>Hedychium spicatum</i>        | NC_047248      |
| 22     | <i>Kaempferia elegans</i>        | NC_040852      |
| 23     | <i>Kaempferia galanga</i>        | NC_040851      |
| 24     | <i>Roscoea alpina</i>            | MT012418       |
| 25     | <i>Roscoea tibetica</i>          | NC_047420      |
| 26     | <i>Roscoea humeana</i>           | NC_046582      |
| 27     | <i>Stahlianthus involucratus</i> | MK262725       |
| 28     | <i>Zingiber montanum</i>         | MK262727       |
| 29     | <i>Zingiber zerumbet</i>         | MK262726       |
| 30     | <i>Zingiber officinale</i>       | NC_044775      |
| 31     | <i>Costus viridis</i>            | MK262733       |
| 32     | <i>Musella lasiocarpa</i>        | NC_035637      |
